# Supplementary material
Source: PubMed Central journal article supplement (PMC7170484)
Supplement: AEM.00055-20-s0001.pdf [file AEM.00055-20-s0001.pdf]

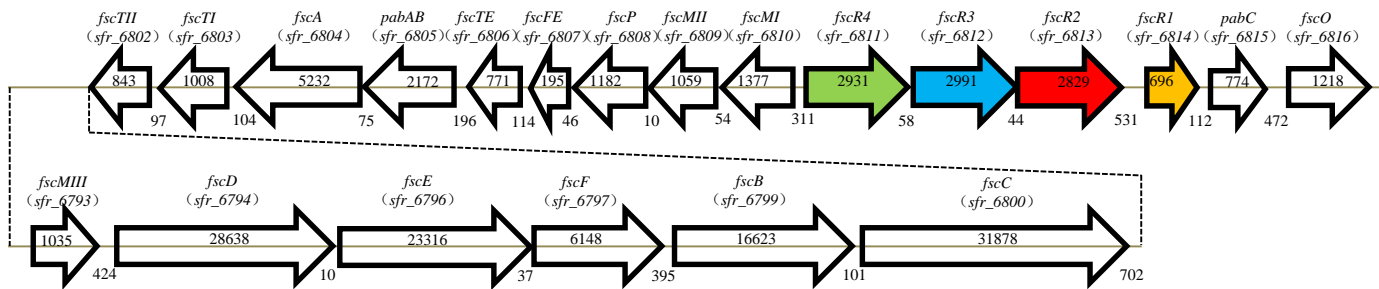

Figure S1. Genetic organization of the FR-008 pathway

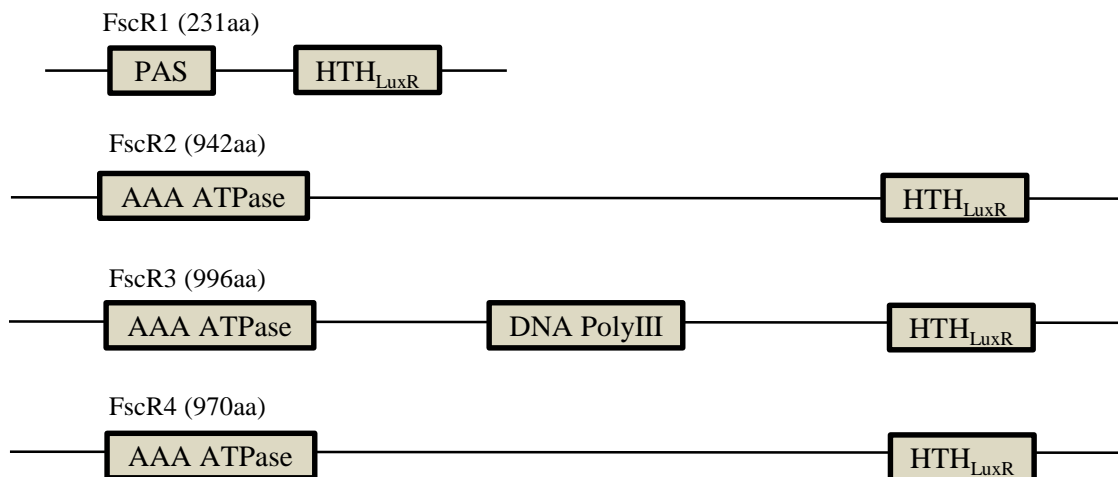

Figure S2. Predicted functional domains for FscR1, FscR2, FscR3, and FscR4. PAS, PAS-like domain; HTH<sub>LuxR</sub>, helix\_turn\_helix of LuxR-type; AAA ATPase, Predicted ATPase; DNA PolyIII, DNA polymerase III subunits.

FscRII 1 - **VLLERTTEFLALVDAALGAATEGRSSLVLLTGP LGI** GRSALLQRLSCLADDRDDVRLRA  
 NysRIII 1 - **VLLERENELARTRAALDAEAGDSSLTLLI** NGPLCSGRSALLRRIPPELAG- - DGTRVLR  
 AmphRIII 1 - **VLLERGAELAAVRQAALSAAAEGRSSHLLVLAGPFCM** GRSTLLHELPRCADEG- TVHVR  
 SalRII 1 **VLLERDDLDEAAATLRRAAAGESSLVVOGALGV** GKSTFLEALSELG- REEDTLLRA  
 orf1 1 - **VLLERTTEFLALVDAALGAATEGRSSLVLLTGP LGI** GRSALLQRLSCLADDRDDVRLRA  
 NppRIII 1 - **VLYDRDP ERLCLRDVAVAGAADGRGAALVVG** GVGITGRITALLDAAAGAAATGTG- LTVLRA

FscRII 60 **HAAPMEQDFAFGVVROLFETLLGDS** PEDARDRWDAHAS- FARHVLADDAAPPAGDCAI A  
 NysRIII 58 **SAAWRERDFEFGIAROLF** DHLLSAG- GAGPAERTAGAE- HFSRLMDTGDRPTGTGPAL E  
 AmphRIII 59 **NAAPAEQDLAVGVVROLFDSLLTAAS**- GPDREQLADAG- AARRVDDVVP- - - DLEA  
 SalRII 60 **QAAAEEESFGLGVVROLFVPLAAAS** TEQARSWRRAAAEGAPPEVRAI AESGLEAPWSAL  
 orf1 60 **HAAPMEQDFAFGVVROLFETLLGDS** PEDARDRWDAHAS- FARHVLADDAAPPAGDCAI A  
 NppRIII 59 **AAALVERDFEHGVAROLFDPMLAA** AGRGTRSRWLAAGGG- ELPAALAAEPVDP- - - PAPE

FscRII 119 **ATEAVLHGLLSLLANVS** ADSRLLI LVDDLQWS DVPSLRWLTYLAKRLHGLRAVVVCAIRD  
 NysRIII 116 **VSQAVLQGAQALLADAS** AERLLI LVDDLQWADGPSLRWL AHTLRRLHGLRALVCTLAD  
 AmphRIII 113 **PDCAYLRDLRLLAGLS** ATAPLLI LIDDLQWADAGSLRWLAGAPRLDFGLRMVVCRLRD  
 SalRII 120 **TVQGAPRWLAALV** DAMAGGRTLVVI DDLHWCDAESLKVLI HTLACRGGMRI VFAVSVLT  
 orf1 119 **ATEAVLHGLLSLLANVS** ADSRLLI LVDDLQWS DVPSLRWLTYLAKRLHGLRAVVVCAIRD  
 NppRIII 115 **VRHGRVRELQELLE** TVSAERPVLVLDLQWADTASLRWLNRLAARVPELPVALVGTIVLH

FscRII 179 **GDPRS** HHTLVREIREAATQTLRPASLSLTATHELVREHFGEAGDDEFVQACHEASVGNPL  
 NysRIII 176 **GDHRGRYP** LREVAGA AHTVLRDAPLSRDATRVLLAGPQGRPPQDAIVRAVYEASRGNPL  
 AmphRIII 173 **GDPGARDP** LVEVVS TAVRVLRFVPLSP AATGELVEAYLGDS PDEAFVRACHDLSRGRPL  
 SalRII 180 **GDV** RGNRCYHEDVLALADRTCVLRPLGGDSTRRLVEESCGAPAEDEFFVEAFRVTRVGNPL  
 orf1 179 **GDPRS** HHTLVREIREAATQTLRPASLSLTATHELVREHFGEAGDDEFVQACHEASVGNPL  
 NppRIII 175 **GDPG** AGRALVRGLAGSATP- LRTRPLGDAAVRGGVADRLGRDGEPEFVQACRDVSACTPS

FscRII 239 **FLLSI** LVGTGFLGRRPLAEHAETARRLRPSQLRERLASI LRTOPAPVRDLAAAI AL LGEQ  
 NysRIII 236 **FLT** AFRSALRATGRPPGGDHFCAVRELSPTVLRRLAGHLRI OPQVREVAVAVAALGDH  
 AmphRIII 233 **FLRSM** LSELALTCGRPLAENAGLVRTARPTHLRDLNCLLLOPRPVRDAAAALATLAGEQ  
 SalRII 240 **L** GALVDEAQRGLRPTAAQAPMVSLRPENVRQRLAGFLRSQPDHLRRAAHALTVLGPD  
 orf1 239 **FLMSI** LVGTGFLGRRPLAEHAETARRLRPSQLRERLASI LRTOPAPVRDLAAAI AL LGEQ  
 NppRIII 234 **VL** HAVLDDVAATCGCP LAVHAGRVREALPAALRERFARCLRAQDDPARRYLGALAVLGTD

FscRII 299 **SDAPT** LARLAGLDSTGYAGALRALGALGALAAPDEPRFI HRSVRDAAESTLTMVQERMH  
 NysRIII 296 **SDP** VLLAQLAGVDEI GFAGARRALVDAGLLARGDRVRFVHGVRDVAVDSLLTLDERERSH  
 AmphRIII 293 **EBP** ALLTRLAGLDDVGTTFALVRLHQLGLTAEERARFAHPAVRIVECSMSAAERQCWH  
 SalRII 300 **SDPE** LLADLAE LDSAQCAEALRVRLAGLVAEDGWLTSTGSLRDLLELLESMPEERTAMR  
 orf1 299 **SDAPT** LARLAGLDSTGYAGALRALGALGALAAPDEPRFI HRSVRDAAESTLTMVQERMH  
 NppRIII 294 **ADP** MTVQRLADLDPHGLRTVQGGQLAEQGLLS- EDHTGF AHPLVREVATG- - - PAERERLH

FscRII 359 **DEAAAL** LYAAGSPAEQVAAQLMAVVTTRRQPWAVDVLRAAADTALRRGAP- - - - - - - - DT  
 NysRIII 356 **DDAAD** LLYRCGRPAEQVAGHLAVVHPGRP WSEAVLRSAAHNALRAGRP- - - - - - - - AD  
 AmphRIII 353 **EAAAE** VLYESGLPAEQVAAQLVAIP TARYPWAVPLRSADAARRRGTG- - - - - - - - EP  
 SalRII 360 **SVAAE** LLHRSCHSAELAAANHLNSTLTLPGDKAVDILRTAARSALTRAST- - - - - - - - RD  
 orf1 359 **DEAAAL** LYAAGSPAEQVAAQLMAVVTTRRQPWAVDVLRAAADTALRRGAP- - - - - - - - DT  
 NppRIII 350 **LRAAW** LTHETGHHVREVAVHLVAVAPLDDWAVEVLRAAAHQAATT AHRPDSADHDGDP A

FscRII 410 **AAGYL** CRALLDSP AAGVGRGRLVVELCTAERGFDP LACERHI AQAVTLLPEPRDRAVAAAL  
 NysRIII 407 **AARYL** RRALLHHRTQDGCRAHLLVLELATAERALDPAACVRHVSQAVALLDTSRDAAAVL  
 AmphRIII 404 **AARYL** RRALLEVAEQDRKRAHLLVLEL ATVERSFDPAAESHI AQALPLLPAARDRAAVL  
 SalRII 411 **AARYL** RRALLEVTSLTGPDRAGLLTELAGAERSFATAASLRHVVEAVPLLDVSRRAAAVV  
 orf1 410 **AAGYL** CRALLDSP AAGVGRGRLVVELCTAERGFDP LACERHI AQAVTLLPEPRDRAVAAAL  
 NppRIII 410 **AVRYL** RRALLDSDVTGHERGVLLVLELAAAERFTEP GTAVRHVSQAVALLDTSARDRATALT

FscRII 470 **RI** SPTALGPAPLTAVDLLRQAAEDLG- PADG- - LTGTDRLDALRLEARLRHCGHEDPHIEL  
 NysRIII 467 **RI** PPSLLAAPS SVAVELVRQAAAGLDEPGQR- - DEEGADELALRLEAWLRHSGHENPVEL  
 AmphRIII 464 **RI** SPWTSPTMRSGRALFRRAADDLRDPYTR- - DDP- GAEEVLRLEARLRYTGI DDYAQL  
 SalRII 471 **RI** GPTELLMDPSAFRVDAMVREVAEEL AASGTK- - - GPEERELALRLCAREHVS AQDPFAHI  
 orf1 470 **RI** SPTALGPAPLTAVDLLRQAAEDLG- PADG- - LTGTDRLDALRLEARLRHCGHEDPHIEL  
 NppRIII 470 **LI** DPSTVRDAIDPVRDAVRAADRIDRDGCGTGP ADDDGRAVTVRI RARARRLDEQRPEGL

Figure S3 Amino acid alignment of FscR2 with its homologous proteins. Numbers indicate amino acid position from the N terminus of the protein. Identical amino acid residues are shaded.

```

FscRI I 1 ----- M P P I E L P L L E R D R E L A A L S A V I G E L G S G R P A V V T V T G E P G
NysRI I 1 M P R S K A R N O P T T C T P Q C A P D A H G D P T M L L E C G R E O R L I G D L L H R L G Q G R P S V L S L T G R P G
AmphRI I 1 --- M T G S T P S P Q P L Y O A R P A T A T A P P A G V R A R E R A T Y A A V V D C L G T S G P V L V T L S G R S G
SalRI 1 ----- M T V V T G E R S P H G S G K T G A P P E L V E R E R E L S V I T E A A R R A A A C S P G L I V L E G P D G
Orf2 1 ----- M P P I E L P L L E R D R E L A A L S A V I G E L G S G R P A V V T V T G E P G

FscRI I 41 L G O N D L L R W A A A Y A T D A G L R V L S A H A T P A E H E V R Y G V V A Q L L A E E N - - R A L A P R L F L T D -
NysRI I 61 H A Q N A L V R W G A C R A R H D G L R V L R A C A T P A E R E L R Y G A V L Q L L A V L D G P H G S T L D A A I R H D
AmphRI I 58 F G G S A L V R L A A D R A R A A G L R V L R A R V T P A E S E L P Y T A M T Q L E P L D - A R P A E R P A T S O G
SalRI 55 I G K S A L L R A L V G - A A P A L H V L T A R A E P E Q O O T P L S L A R R L V A P L A E A H R A D F A L P W P V H
Orf2 41 L G O N D L L R W A A A Y A T D A G L R V L G A H A T P A E H E V R Y G V V A Q L L A E E N - - R A L A P R L F L T D -

FscRI I 98 - E Q P G G L P G - - - - - - - - - - - - - - - - - - - - - - - - - - - - - - - - - - - - - - - - - - - - - - - - -
NysRI I 121 G P P P L P V P G - - - - - - - - - - - - - - - - - - - - - - - - - - - - - - - - - - - - - - - - - - - - - - - - -
AmphRI I 116 P N R R E P F P G - - - - - - - - - - - - - - - - - - - - - - - - - - - - - - - - - - - - - - - - - - - - - - - - -
SalRI 113 P E K S A D P T A R G K S D I D V N A V P H G L L A E L Y E L L R S A A T H R P L L A V E A H L A D P A S L H F L A
Orf2 98 - E Q P G G L P G - - - - - - - - - - - - - - - - - - - - - - - - - - - - - - - - - - - - - - - - - - - - - - - - -

FscRI I 138 A L A R R L - - - - P R A P V A L L T S T T I G T A L T R P E W S V G T P L T G L A T T I E L A L P P L T S G G T A T A V
NysRI I 162 T L L R H L G P D T P L A V L A S S C G D T T A F D T D P K A P A V P G P D T V P V A R F V V P A L T D R G V A A T V
AmphRI I 157 A L L R R S - - - - A G T P L A V V C G G N D T A A A D P C W O S A L G S V P G P L A H H L T L A P L P P E E V A A E V
SalRI 173 H T A R R L P G - O P V L L A L S C R G G H A S A S L D E I A A Q P - - - - - - - - - - - - - - - - - - - - - - - - - - - - - -
Orf2 138 A L A R R L - - - - P R A P V A L L T S T T I G T A L T R P E W S V G T P L T G L A T T I E L A L P P L T S S G T A T A V

FscRI I 194 L R A F G A P G D P A F T E A L A E A T R G I P A V V H D V L D R F A R A C Y S P R A D R I D P L R A L T A E V V G D H
NysRI I 222 R A V C G T P G D E E F I A A L T S A T A G N P A I L R D A L R A F V D H G L P A D A D H L P E L H A L T A G V V G D H
AmphRI I 213 A R V C G - P A D D A F T A E A R R I S A G H P T V L H D L V Q R F A A L C H R P A A D R V P A L R A I G T E V L G D Q
SalRI 225 Q A L T G S A G A C F O G S C L A V T G G P L L V T R L V S A L R E N G L D L T V E N I T A V D G O G A O S F R S R
Orf2 194 L R A F G A P G D P A F T E A L A E A T R G I P A V V H D V L D R F A R A C H S P R A D R I D P L R A L T A E V V G D H

FscRI I 254 A T R A L S D L R D P A A V D A L R A L A V C G D L L D F P L V C T L A G P H S V S E S R L R A A L A A S G L T T L R D
NysRI I 282 T V R A L D G P - A E V N A V L R A L A V C G D L L D F H R V R A L A G A H S L S E D R I R T L L A S V G L T V S V G
AmphRI I 272 L L Y A V R G L G - P E A G E V V R A L A V C G D L L D L Q V V R T L T R V R S F N E N R L R A A L A R T V G L R T L P
SalRI 285 I A H L S Q O P - D S V L R A V R A M A V L G D G T P T D L C G R L A T L D E P A F A O S L F T L N S L G L V G F T A
Orf2 254 A T R A L S D L R D P A A V D A L R A L A V C G D L L D F P L V C T L A G P H S V S E S R L R A A L A A S G L T T L R D

FscRI I 314 G H - P R V Q D A V V R A R V L E E M P A A D R A E L Y A R A A G L A Q R V A A D D O G I A D L L L L A R P V G - D P
NysRI I 341 D K - - V H I R F P A S K A R V I E D M P A A R A D L V Y R A A E L T H S C G V N D E V A H L L R S S P L G - A P
AmphRI I 331 N G - - R L S V E P E L R V R V L E E M T A D D R T E L H I R A A E L A H R A G A D R A V A E L L L A A R P T G - S A
SalRI 344 G A G A W S F T E P V V R E A V L D G I G D R E G G A A H G R A A R L L H D S G A P T A E V I A Q L L R S Q G T P T E P
Orf2 314 G H - P R V Q D A V V R A R V L E E M P A D R A E L Y A R A A G L A Q R V A A D D O G I A D L L L L A R P V G - D P

FscRI I 371 W A V D T L R R G F T S A L R C G R R D L A V A Y L A R A L D E P L A A E D R A R I E F Q L A S V E N V T A P I A A E R
NysRI I 398 W V P L L R R G F A A A L R R E D H H R A C A C L S R A L C E P L D P R E R S L T L E L A A A E A V A R P E A G D R
AmphRI I 388 W A T R T L R R D A E H A V R E C E H A R A A V L L A R A S E B E Q D P A E H A R L G L E L A A V O L I I E P E A G D L
SalRI 404 W A T T L L R E A A R A M L A S R P E R A V E L L R P C V P E G R E N E C S P A L T E L G V A E G R V D P E A A V G
Orf2 371 W A V D T L R R G F T S A L R C G R R D L A V A Y L A R A L D E P L A A E D R A R I E F Q L A S V E N V T A P A A A E R

FscRI I 431 R L G G L I R - - - - A T R P C P G A G L R A R A T D L C L L C G D T R A A R H A L A G A I D S A P A A P E P R R G P
NysRI I 458 R L G E L V R S T V A D T D P T S S G E G V G V R A I D L C F A R G N S E W V R R T A G E A L P Y A G P A D - - - - -
AmphRI I 448 R I E R L I R - - - - T - - P C T P A A V R L Y A A D L G L T A G G S E T V S R S L A D A L T V T S G T E - - - - -
SalRI 464 H E T V A L K R A I D P E L R L T A L S A L A V G L A R T C Q L A R A V G L L N R H R T T G A E D G V A S - - - - -
Orf2 431 R L G G L I R - - - - A T R P C P G A G L R A R A T D L C L L C G D T R A A R H A L A G A I D S A P A A P E P R R G P

FscRI I 486 T G A P A V P P E A E P A S T P R T H L V P H R P Y A G T P P G A T G P D C R R S A A P D L P G T P R A H D A P R S P G
NysRI I 512 - - - - - - - - - - - - - - - - - - - - - - - - - - - - - - - - - - - - - - - - - - - - - - - - -
AmphRI I 495 - - - - - - - - - - - - - - - - - - - - - - - - - - - - - - - - - - - - - - - - - - - - - - - - -
SalRI 517 - - - - - - - - - - - - - - - - - - - - - - - - - - - - - - - - - - - - - - - - - - - - - - - - -
Orf2 486 T G A P A V P P E A E P P S T S R T H L V P H R P Y A G T P P G A A G P D C R R S A A P D L P G T P R A H D G P R S S G

```

Figure S4. Amino acid alignment of FscR3 with its homologous proteins. Numbers indicate amino acid position from the N terminus of the protein. Identical amino acid residues are shaded.

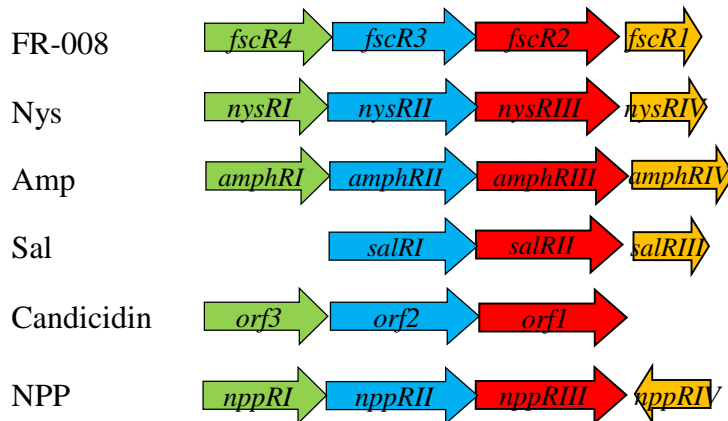

Figure S5. Genetic organization of the four regulatory genes *fscR1-fscR4* in *Streptomyces* sp. FR-008 and syntenic clusters in different polyene pathways. FR-008, FR-008 pathway in *Streptomyces* sp. FR-008; Nys, Nystatin pathway in *Streptomyces noursei* ATCC 11455; Amp, amphotericin pathway in *Streptomyces nodosus*; Sal, salinomycin pathway in *Streptomyces albus* CCM 4719; Can, candicidin pathway in *Streptomyces griseus*; Npp, the nystatin-like *Pseudonocardia* polyene pathway in *Pseudonocardia autotrophica*.

Methanol

FR-008

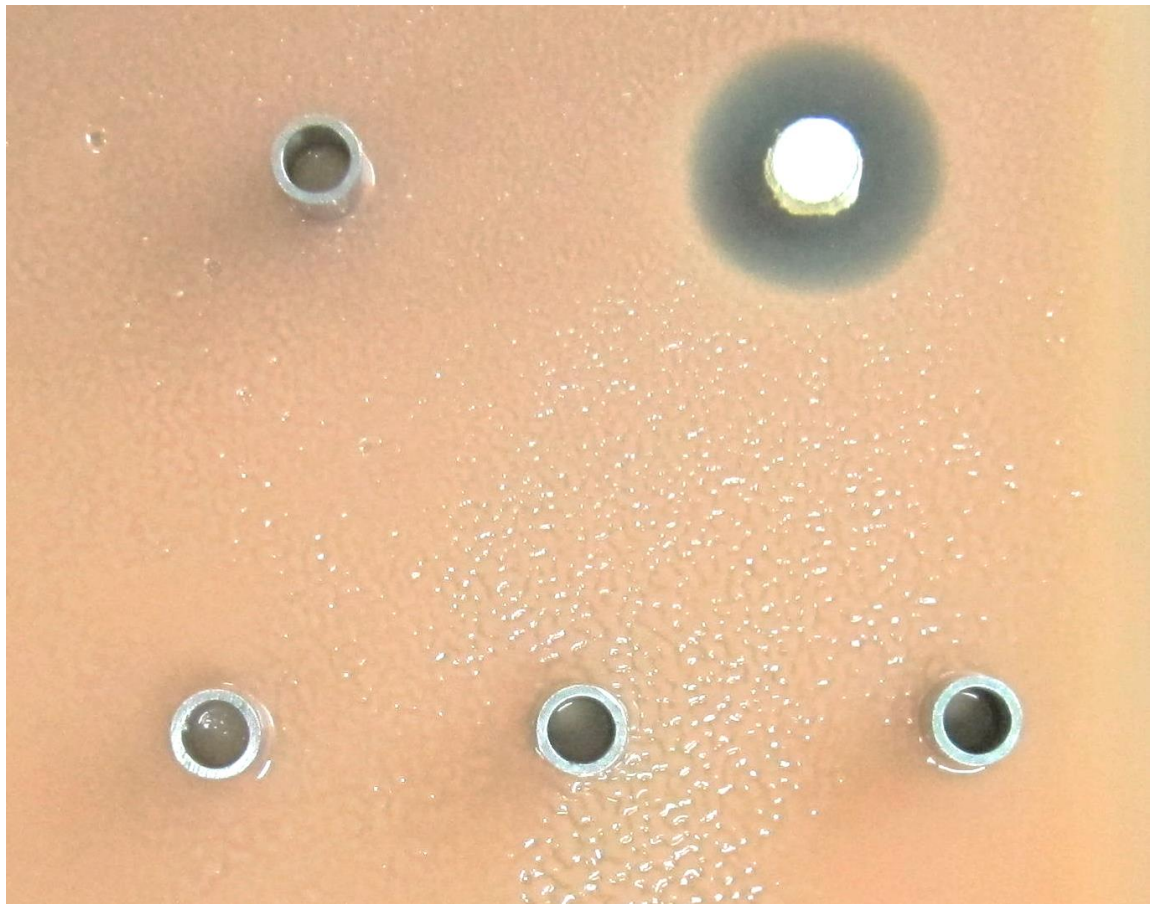

Antimycin  
(0.1 µg/ml)

Antimycin  
(1 µg/ml)

Antimycin  
(10 µg/ml)

Figure S6. Sensitivity test of the indicator strain *Rhodotorula rubra* to antimycin. One-hundred microliters of different concentrations of antimycin, prepared from a stock solution, or 100 µl methanol (solvent control), was loaded into steel cylinders positioned on the medium seeded with *Rhodotorula rubra*. FR-008, wild-type *Streptomyces* sp. FR-008.

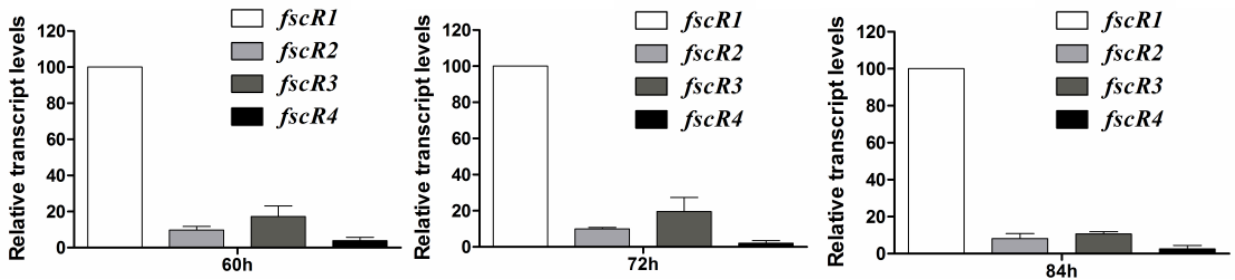

Figure S7. Comparison of the relative expression of *fscR1*-*fscR4* in the wild-type strain during growth in YEME liquid medium. In this assay, RNA samples were isolated at the indicated times, expression of *hrdB*, which encodes the major sigma factor, was used as an internal control, the expression level of *fscR1* at each time point was arbitrarily set to 100, and the y-axis shows the fold change in expression of each gene at the indicated times over the expression of *fscR1*. Results are the mean ( $\pm$ SD) from triplicate biological experiments.

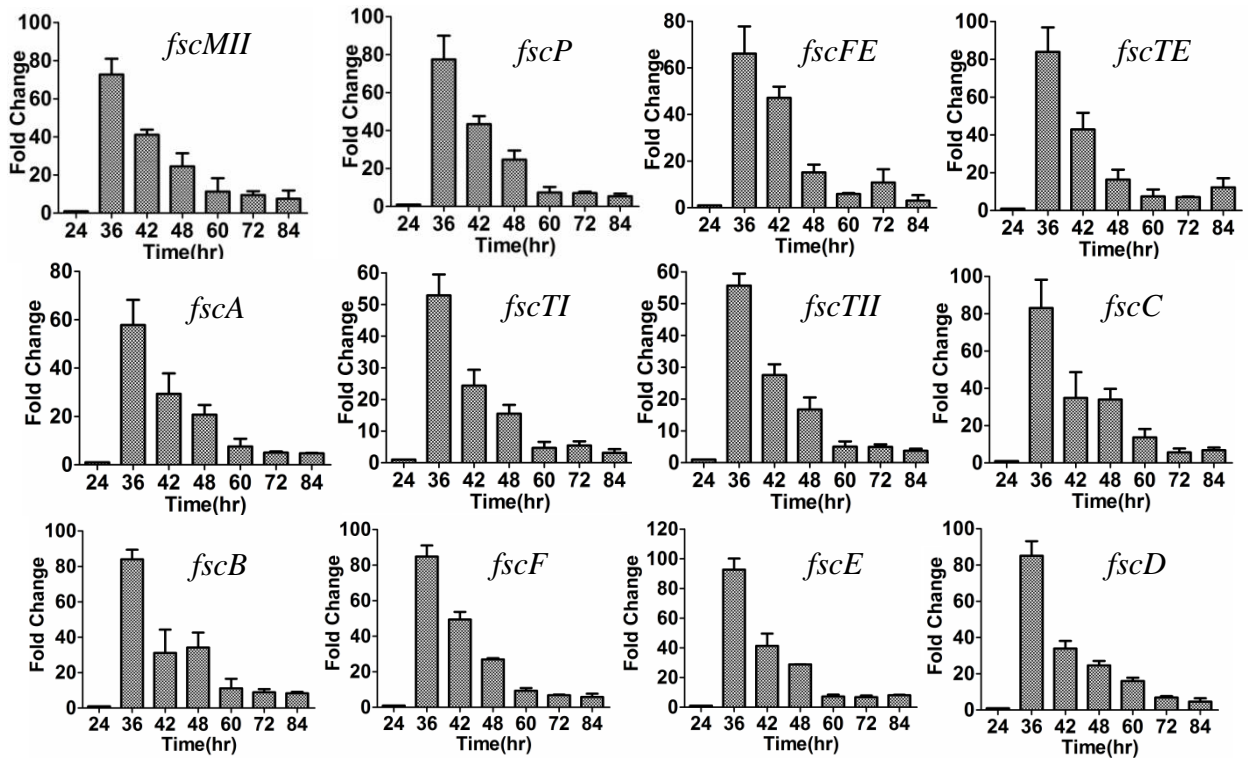

Figure S8. Temporal expression pattern of structural genes of the FR-008 pathway in the wild-type *Streptomyces* sp. FR-008 strain cultured in YEME liquid medium. RNA samples were isolated at the indicated times. Expression of *hrdB*, which encodes the major sigma factor, was used as an internal control. The expression level of each gene at 24 h was arbitrarily set to one. The y-axis shows the fold change in expression level at the indicated times over the level at 24 h. Results are the mean ( $\pm$ SD) from triplicate biological experiments.



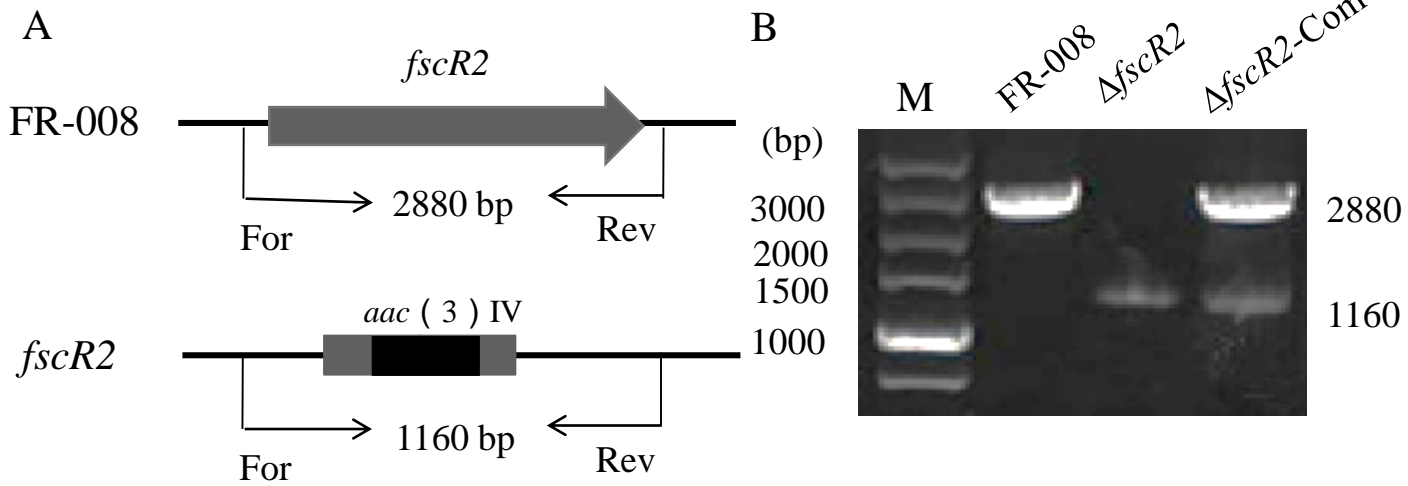

Figure S9. Replacement of an internal region of *fscR2* from *Streptomyces* sp. FR-008. The mutation in  $\Delta fscR2$  was confirmed by PCR analysis.

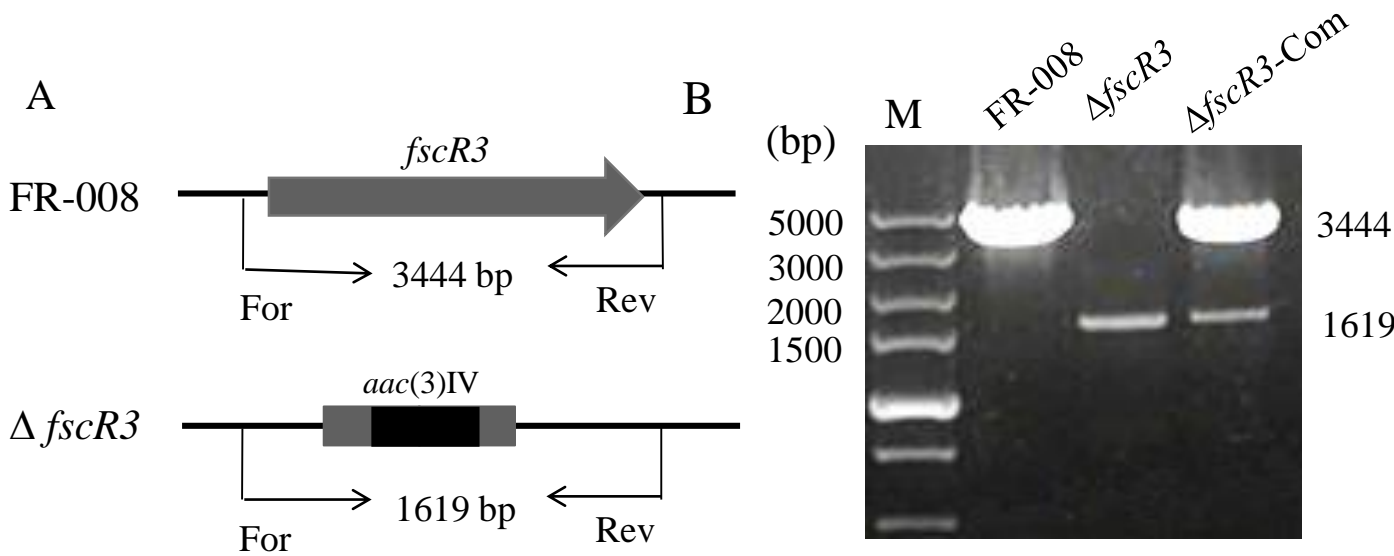

Figure S10. Replacement of an internal region of *fscR3* from *Streptomyces* sp. FR-008. The mutation in  $\Delta fscR3$  was confirmed by PCR analysis.

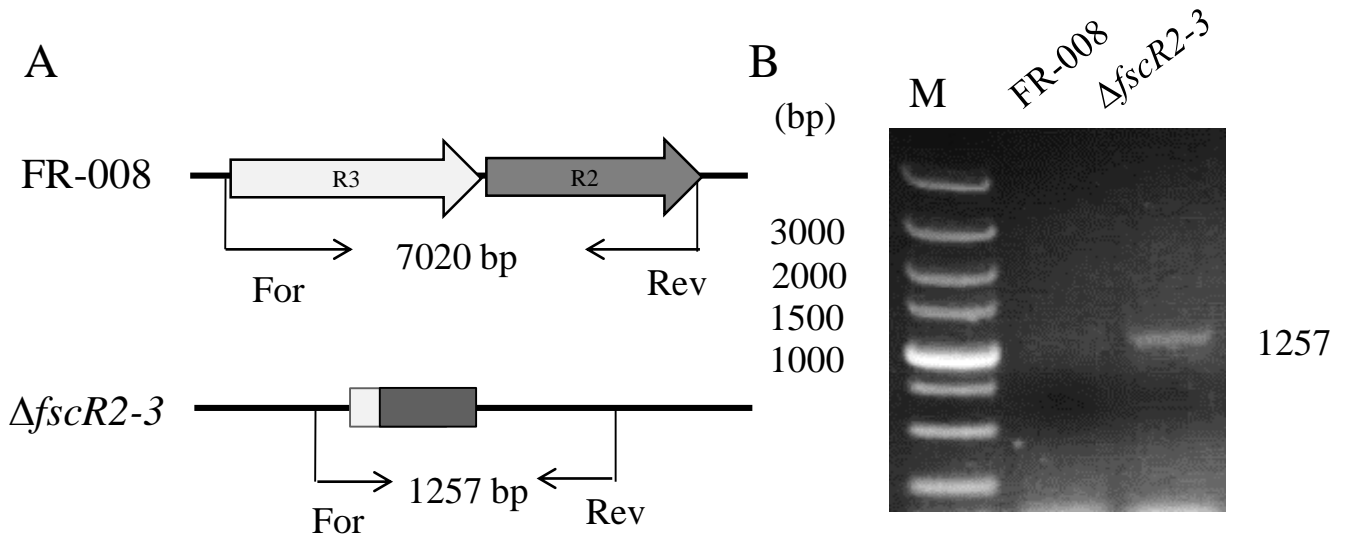

Figure S11. Deletion of the chromosomal region from *fscR2* to *fscR3* from *Streptomyces* sp. FR-008. The deletion in  $\Delta fscR2-3$  was confirmed by PCR analysis.

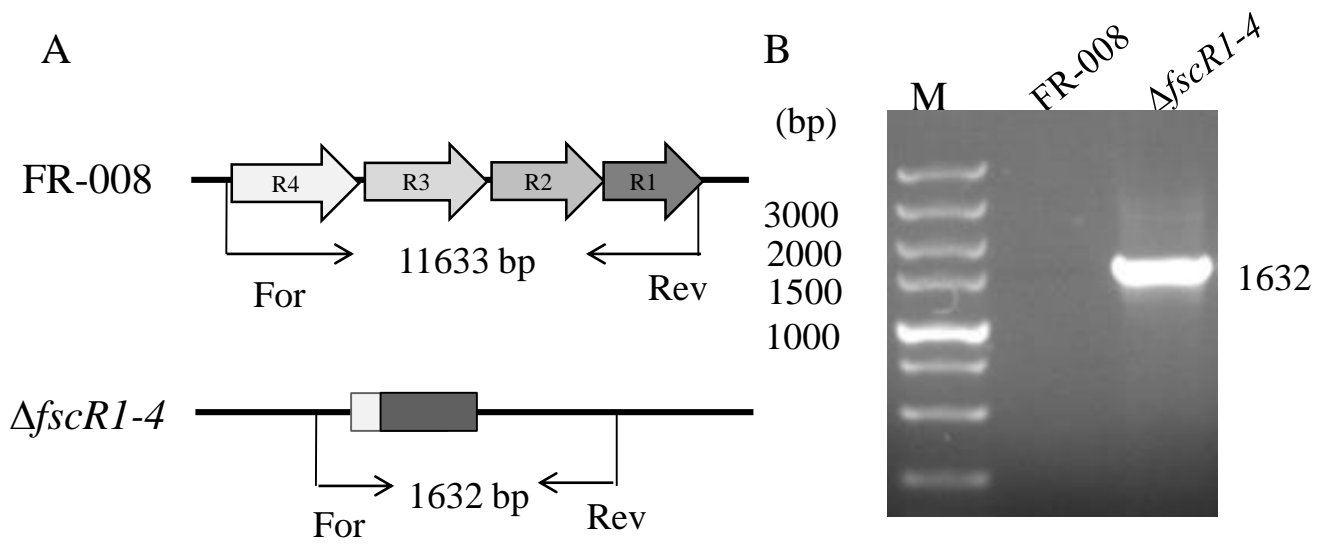

Figure S12. Deletion of the chromosomal region from *fscR1* to *fscR4* from *Streptomyces* sp. FR-008. The deletion in  $\Delta fscR1-4$  was confirmed by PCR analysis.

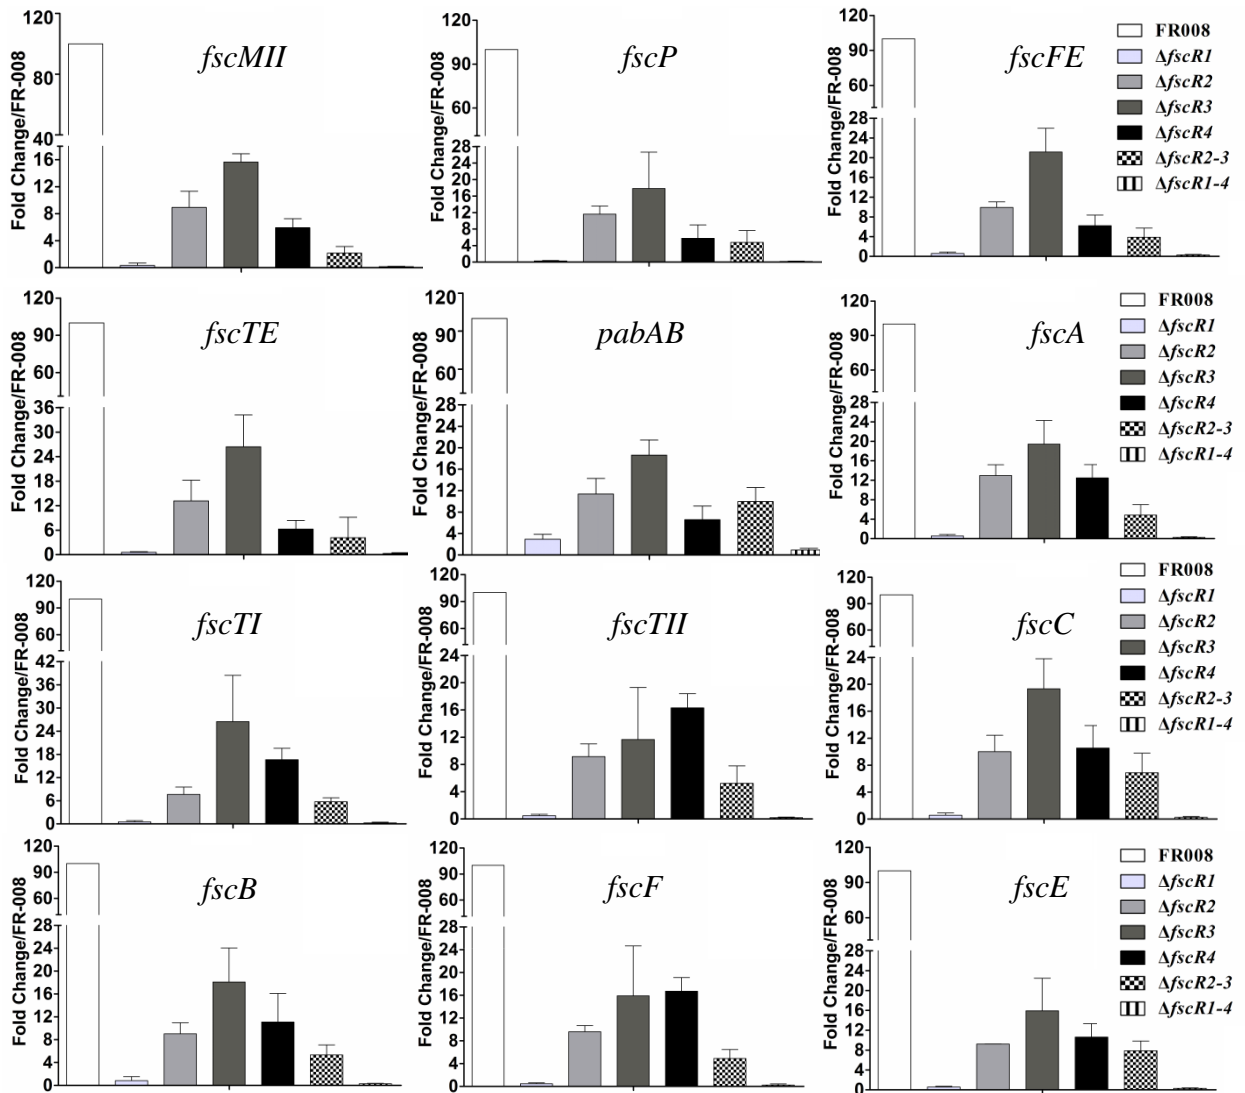

Fig. S13 *fscR1-fscR4* exert different levels of control over structural genes in the FR-008 pathway. RNA samples were isolated from *Streptomyces* sp. FR-008, single mutation strains, and multi-mutation strains grown for three days in YEME liquid medium. Expression of *hrdB*, which encodes the major sigma factor, was used as an internal control. The expression level of each gene in the wild-type strain was arbitrarily set to 100. The y-axis shows the fold change in expression level relative to the control. Results are the mean ( $\pm$ SD) from six biological experiments.

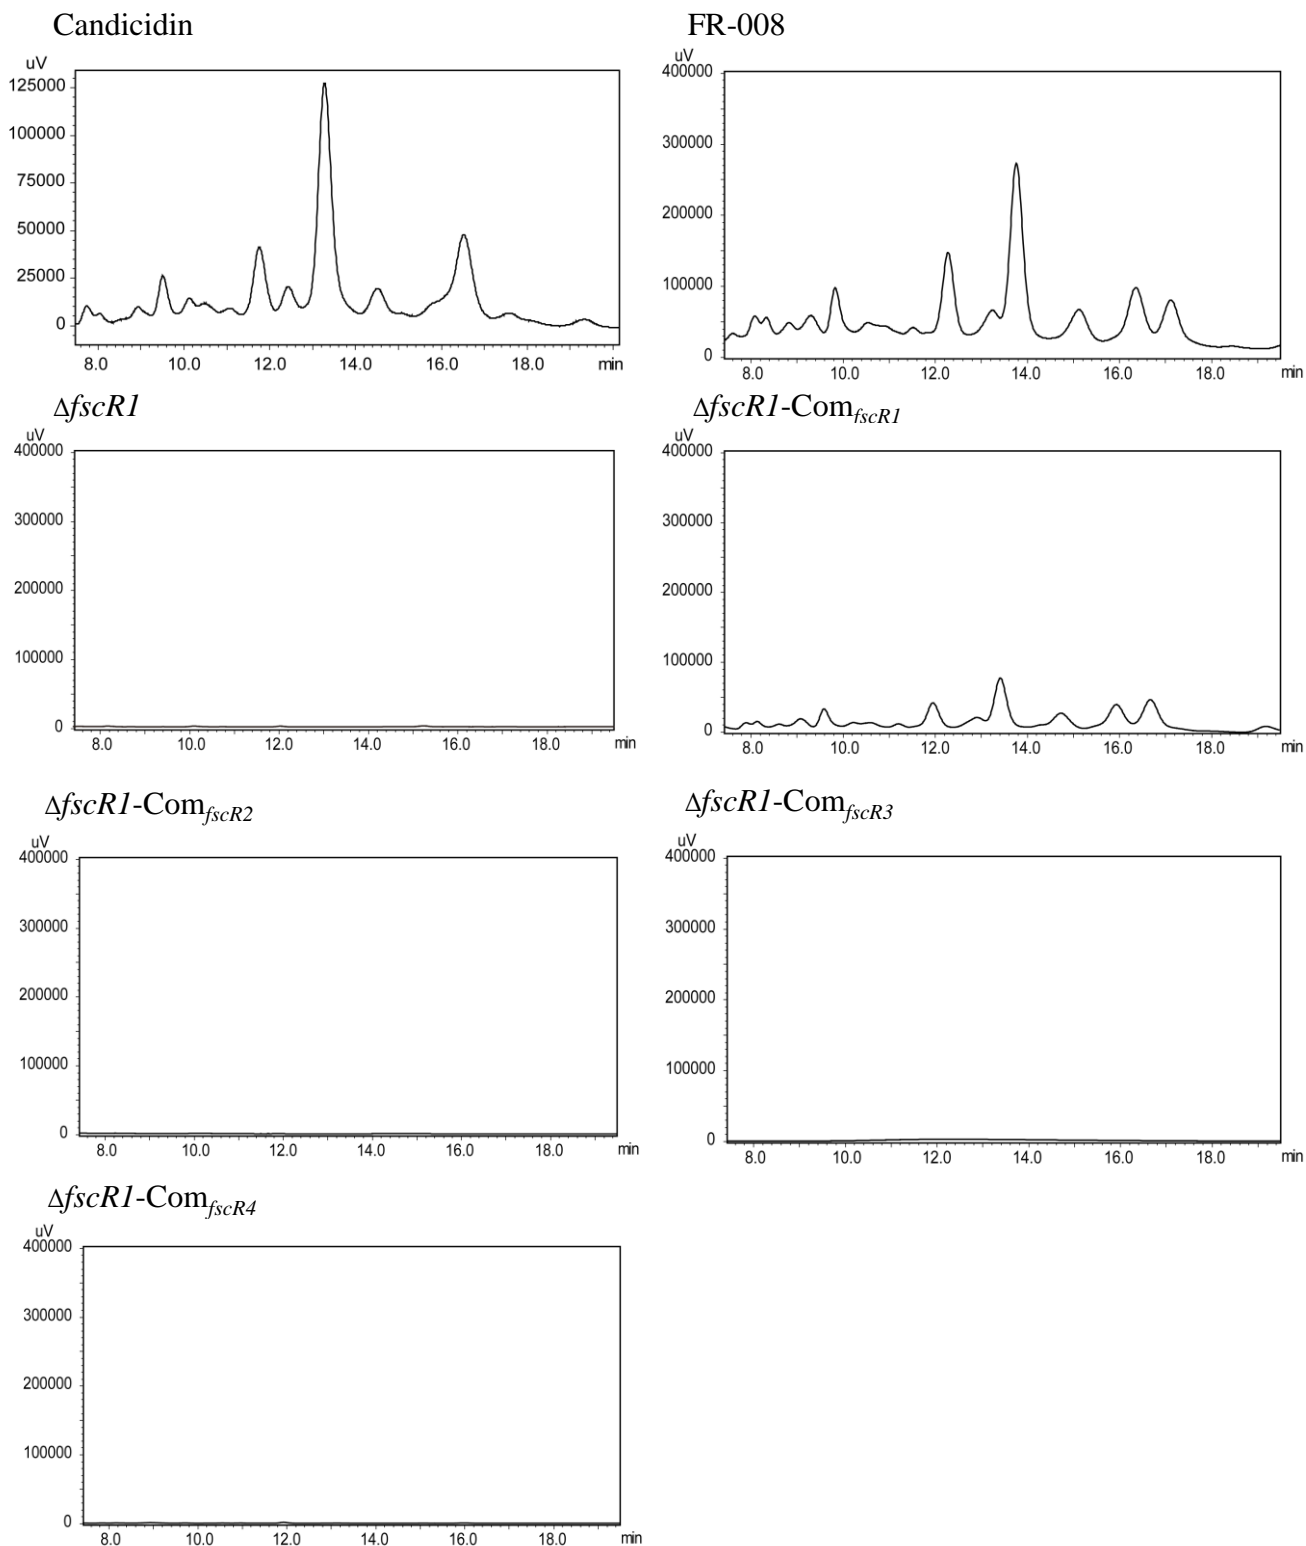

FIG S14. Production of candidin by cross-complemented variants of  $\Delta fscR1$ . The candidin complex was extracted from strains grown on GS agar medium for 3 days before HPLC analysis.  $\Delta fscR1$  was complemented with *fscR1*, *fscR2*, *fscR3*, or *fscR4* as indicated. Top left panel, candidin standard. Top right panel, wild-type *Streptomyces* sp. FR-008 strain.

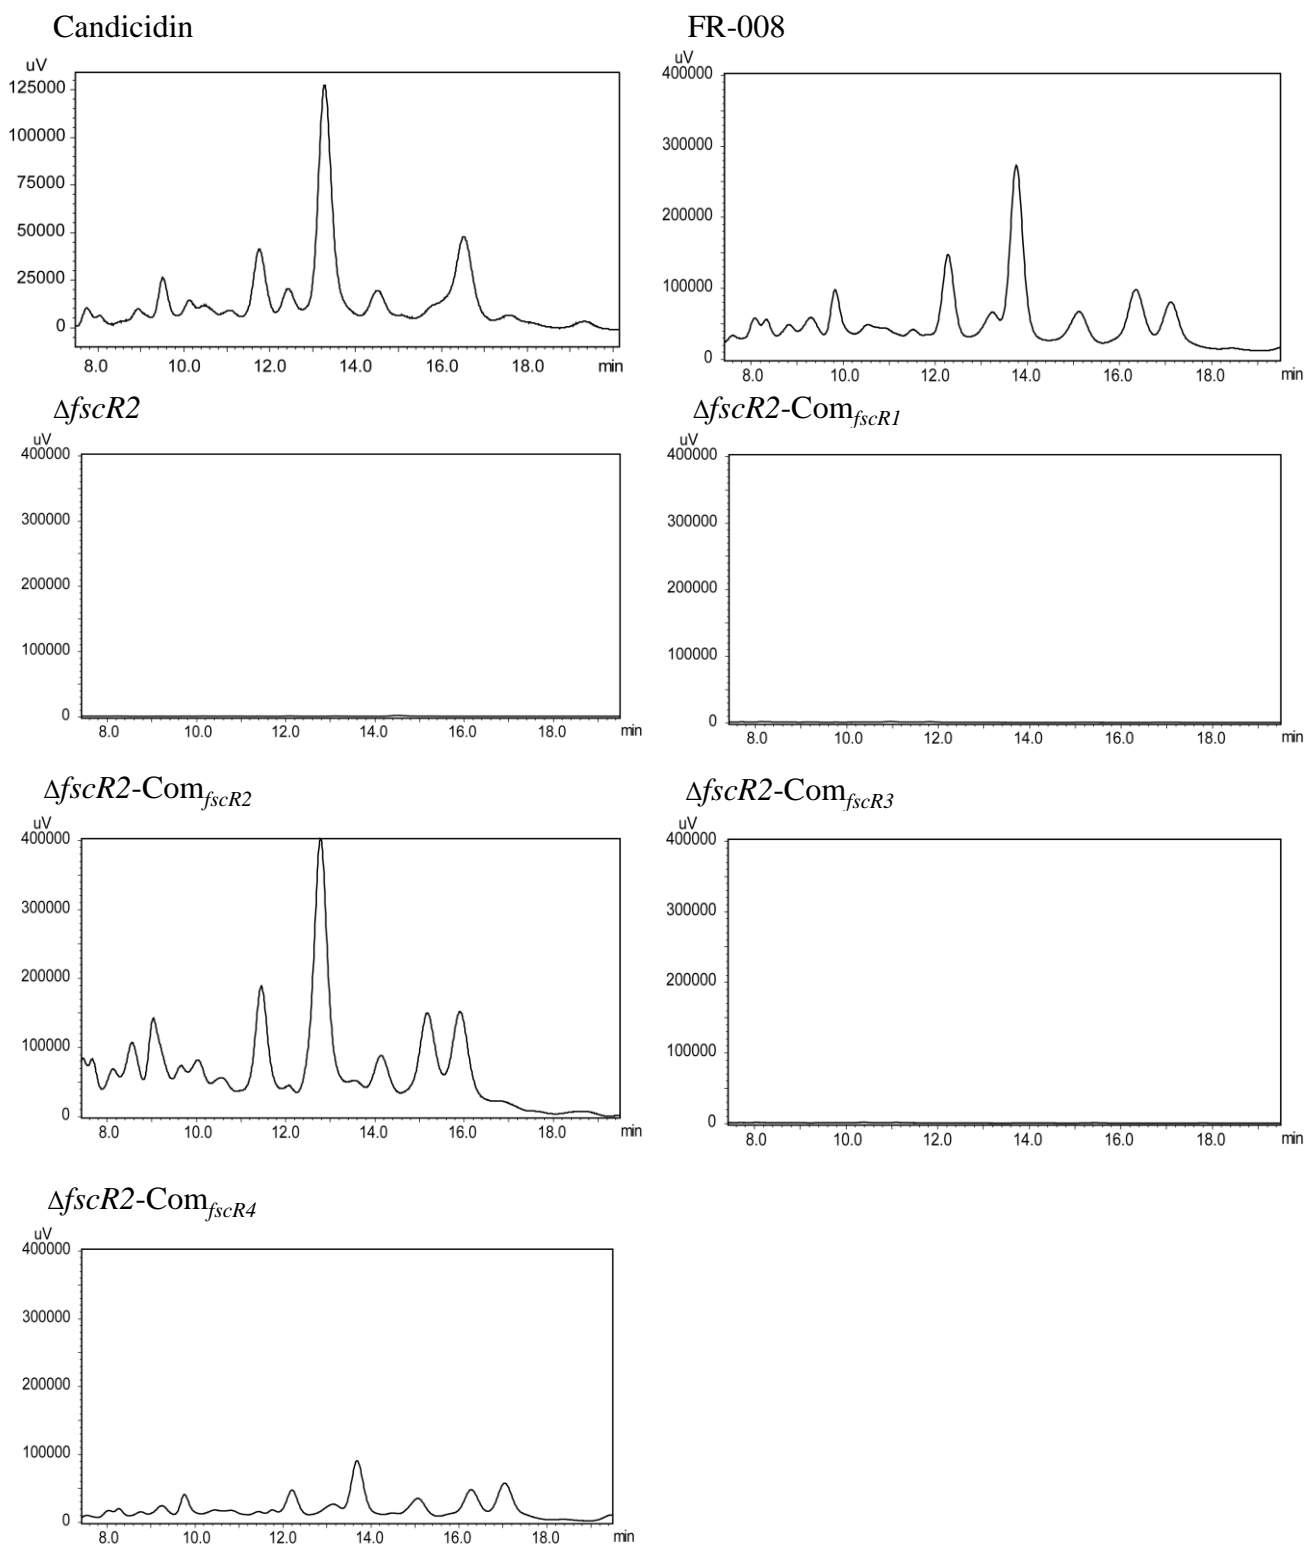

Figure S15. Production of candidin by cross-complemented variants of  $\Delta fscR2$ . The candidin complex was extracted from strains grown on GS agar medium for 3 days before HPLC analysis.  $\Delta fscR2$  was complemented with *fscR1*, *fscR2*, *fscR3*, or *fscR4* as indicated. Top left panel, candidin standard. Top right panel, wild-type *Streptomyces* sp. FR-008 strain.

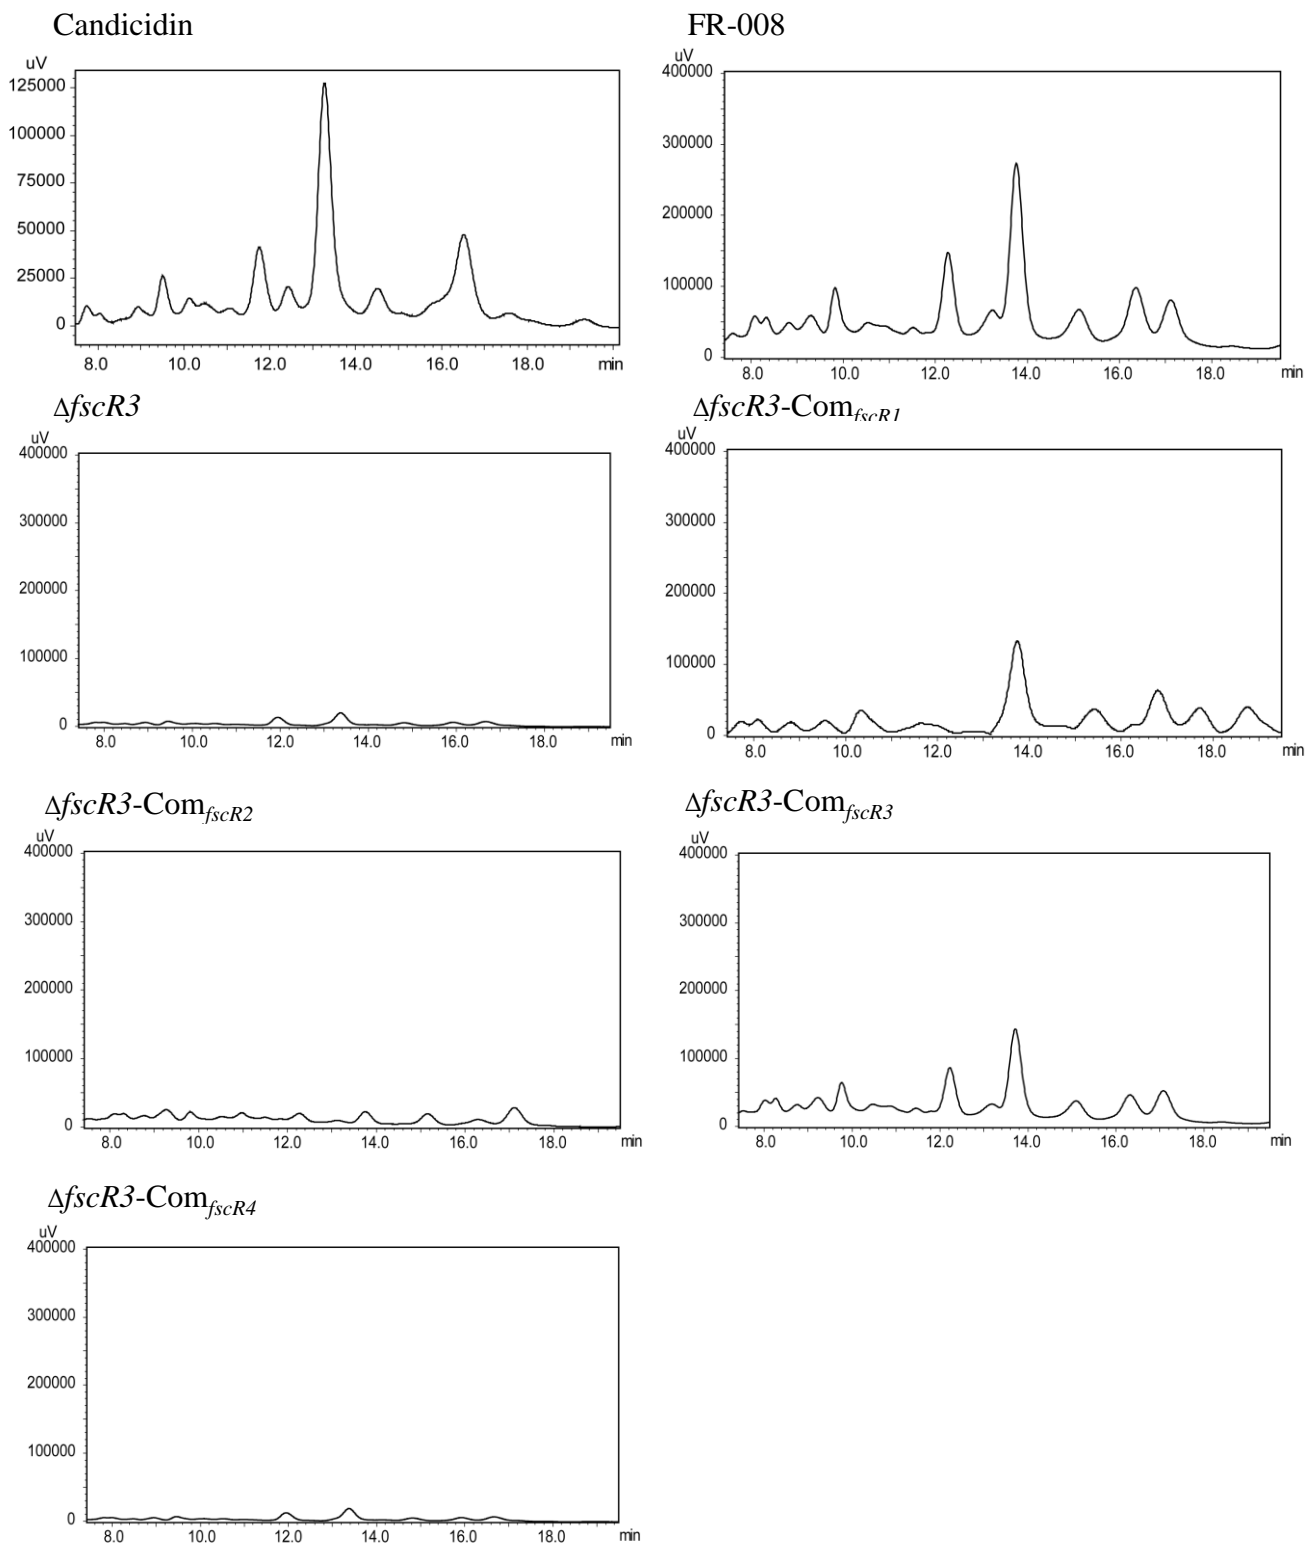

Figure S16. Production of candicidin by cross-complemented variants of  $\Delta fscR3$ . The candicidin complex was extracted from strains grown on GS agar medium for 3 days before HPLC analysis.  $\Delta fscR3$  was complemented with *fscR1*, *fscR2*, *fscR3*, or *fscR4* as indicated. Top left panel, candicidin standard. Top right panel, wild-type *Streptomyces* sp. FR-008 strain.



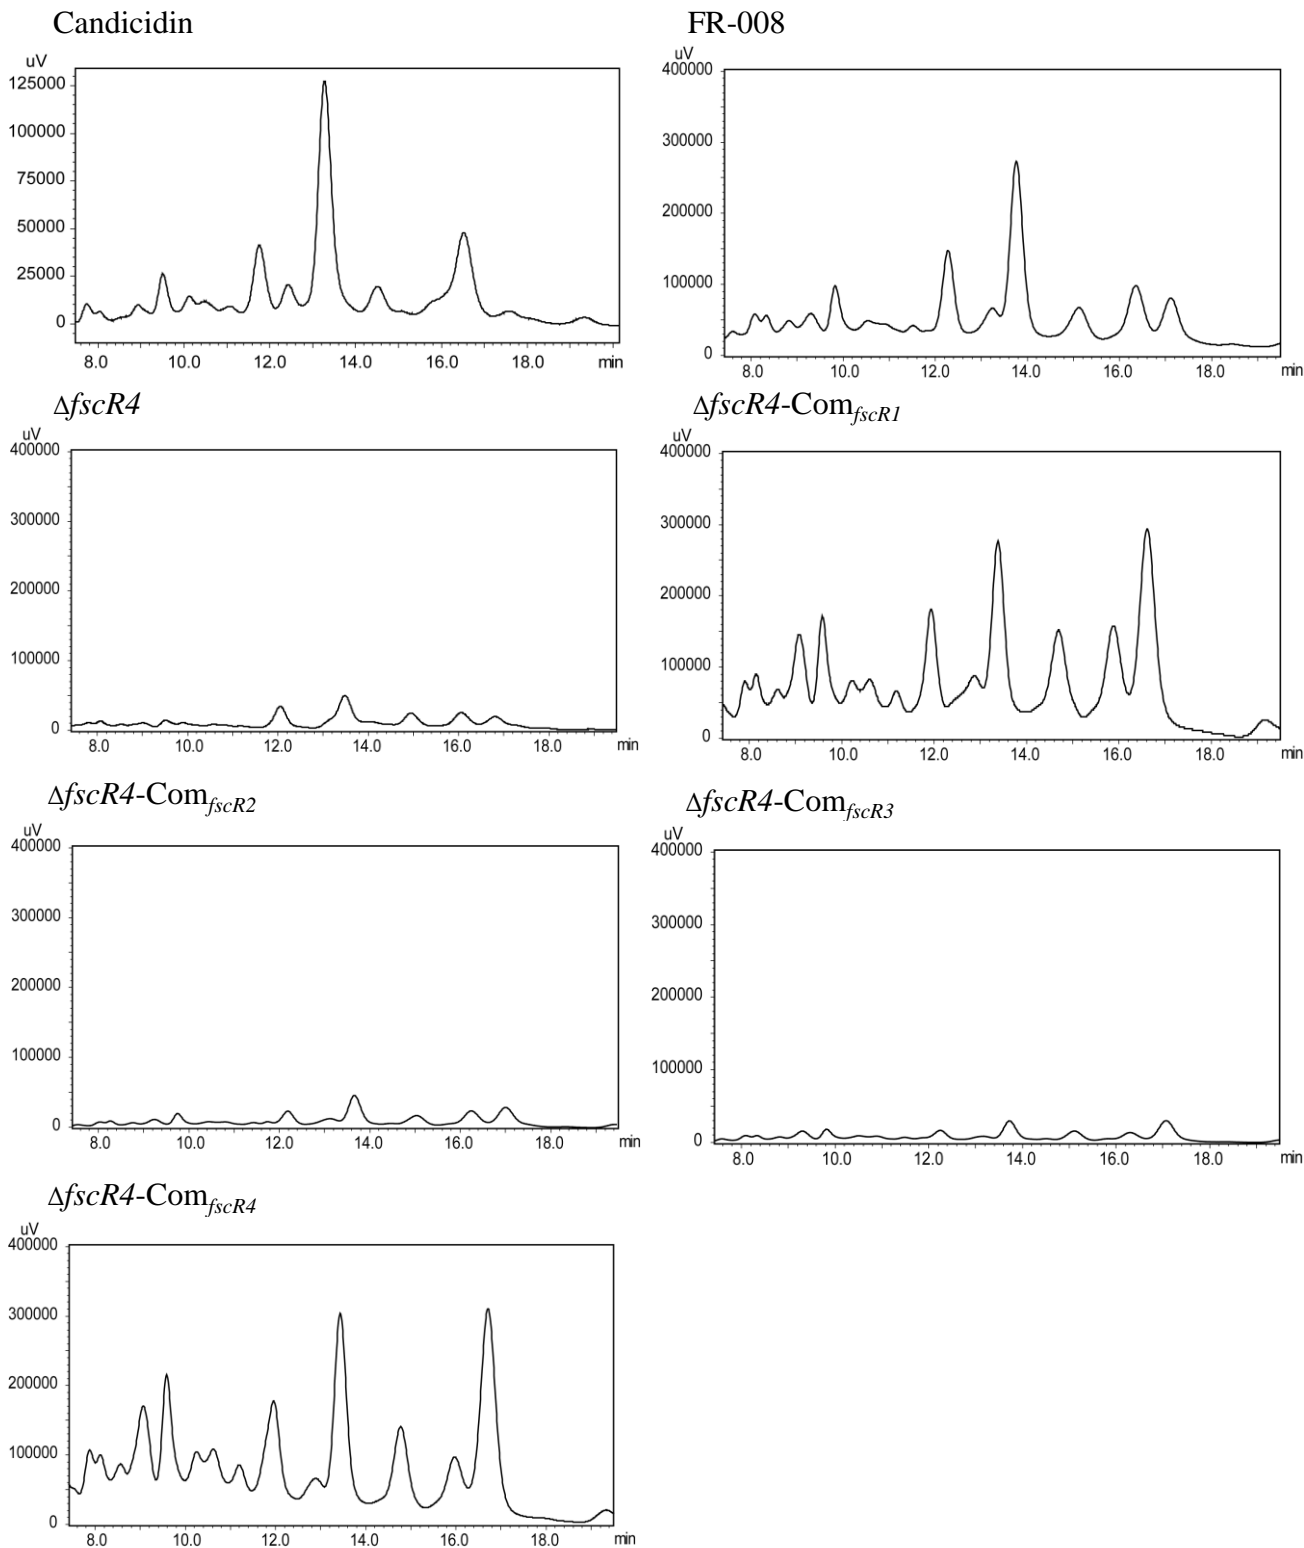

Figure S17. Production of candicidin by cross-complemented variants of  $\Delta fscR4$ . The candicidin complex was extracted from strains grown on GS agar medium for 3 days before HPLC analysis.  $\Delta fscR4$  was complemented with *fscR1*, *fscR2*, *fscR3*, or *fscR4* as indicated. Top left panel, candicidin standard. Top right panel, wild-type *Streptomyces* sp. FR-008 strain.

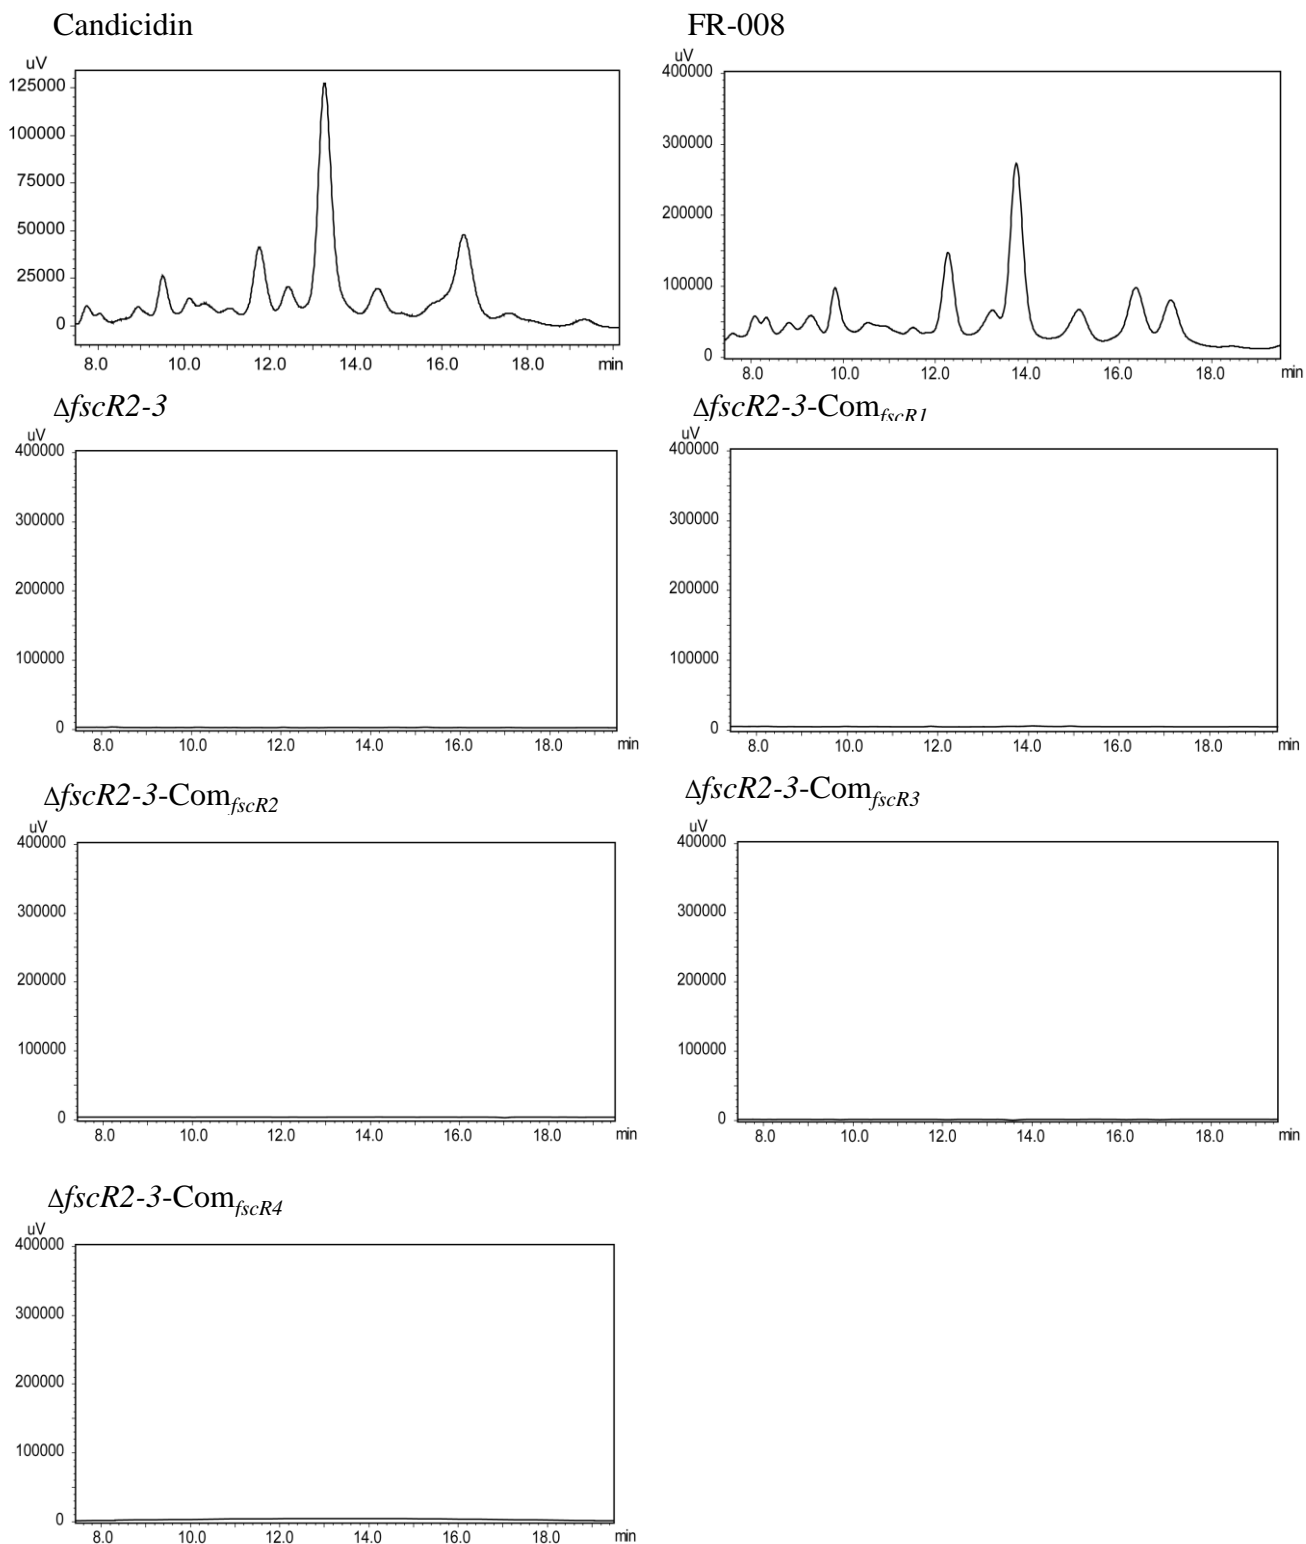

Figure S18. Production of candicidin by cross-complemented variants of  $\Delta fscR2-3$ . The candicidin complex was extracted from strains grown on GS agar medium for 3 days before HPLC analysis.  $\Delta fscR2-3$  was complemented with *fscR1*, *fscR2*, *fscR3*, or *fscR4* as indicated. Top left panel, candicidin standard. Top right panel, wild-type *Streptomyces* sp. FR-008 strain.

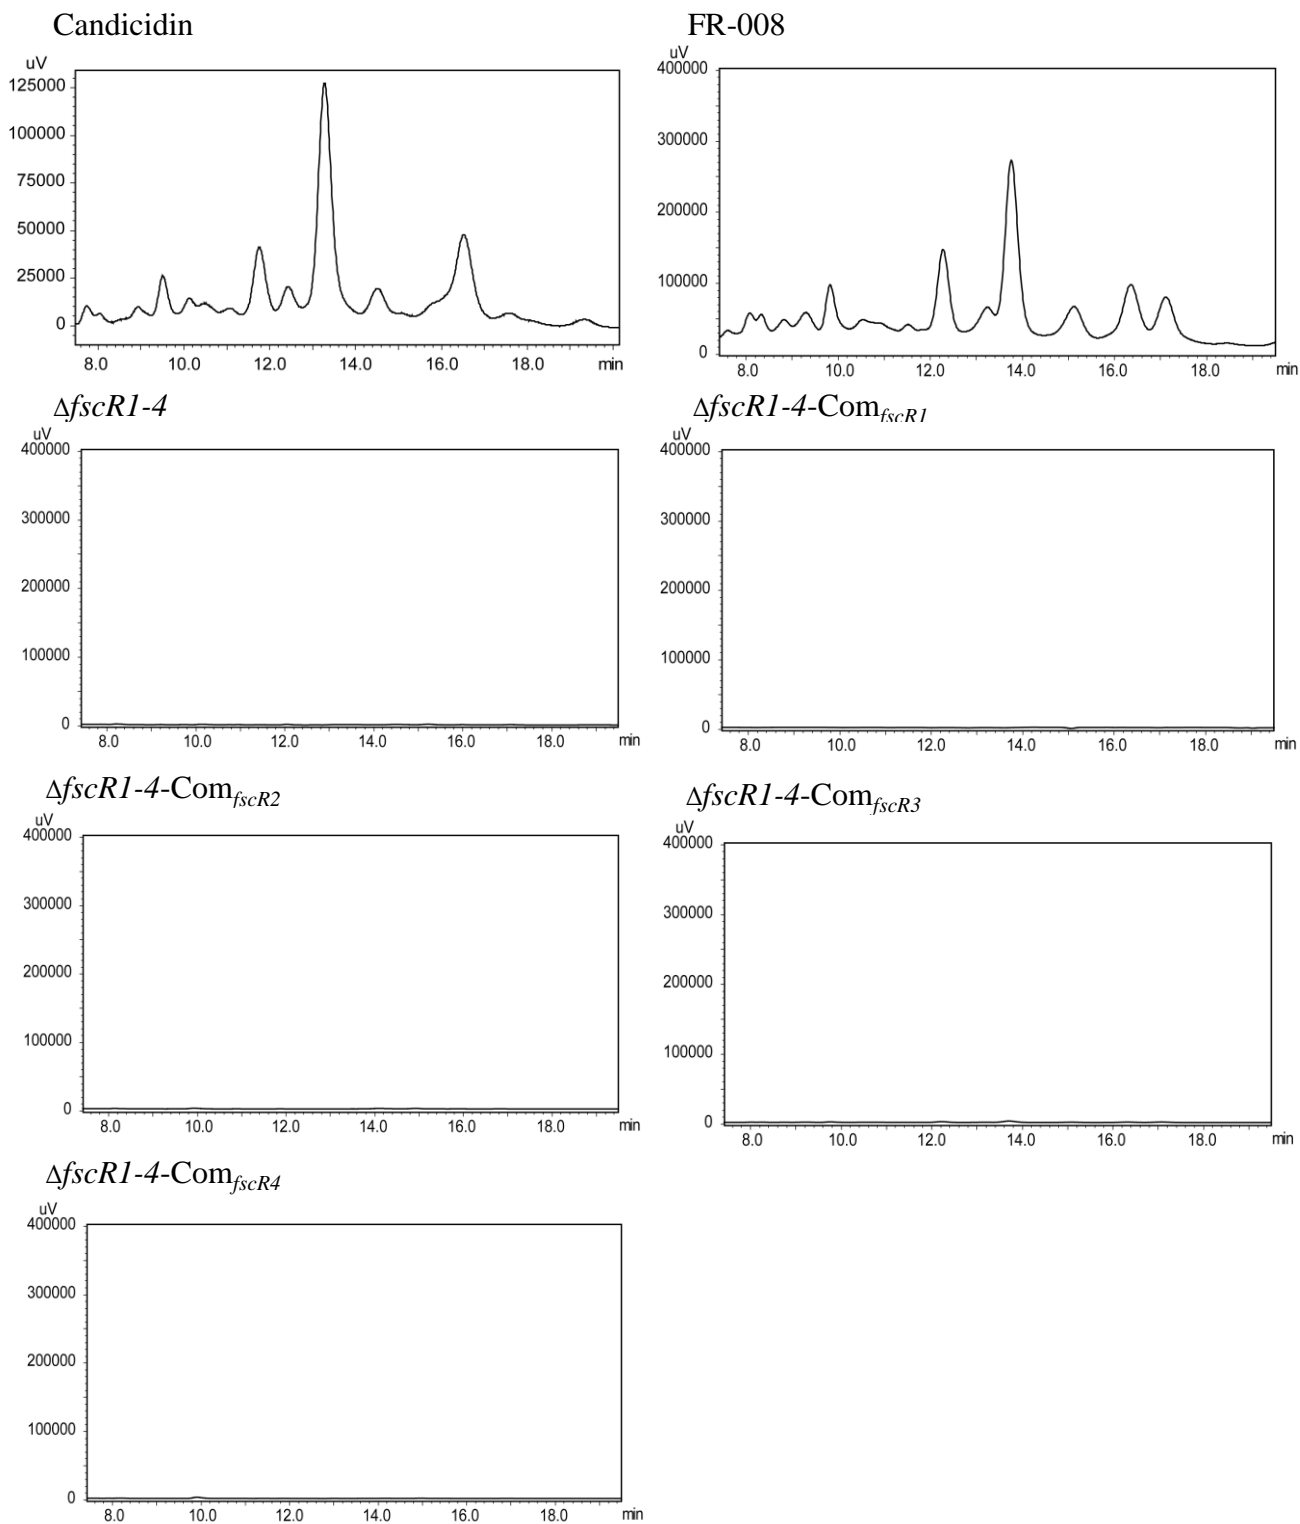

Figure S19. Production of candidin by cross-complemented variants of  $\Delta fscR1-4$ . The candidin complex was extracted from strains grown on GS agar medium for 3 days before HPLC analysis.  $\Delta fscR1-4$  was complemented with  $fscR1$ ,  $fscR2$ ,  $fscR3$ , or  $fscR4$  as indicated. Top left panel, candidin standard. Top right panel, wild-type *Streptomyces* sp. FR-008 strain.

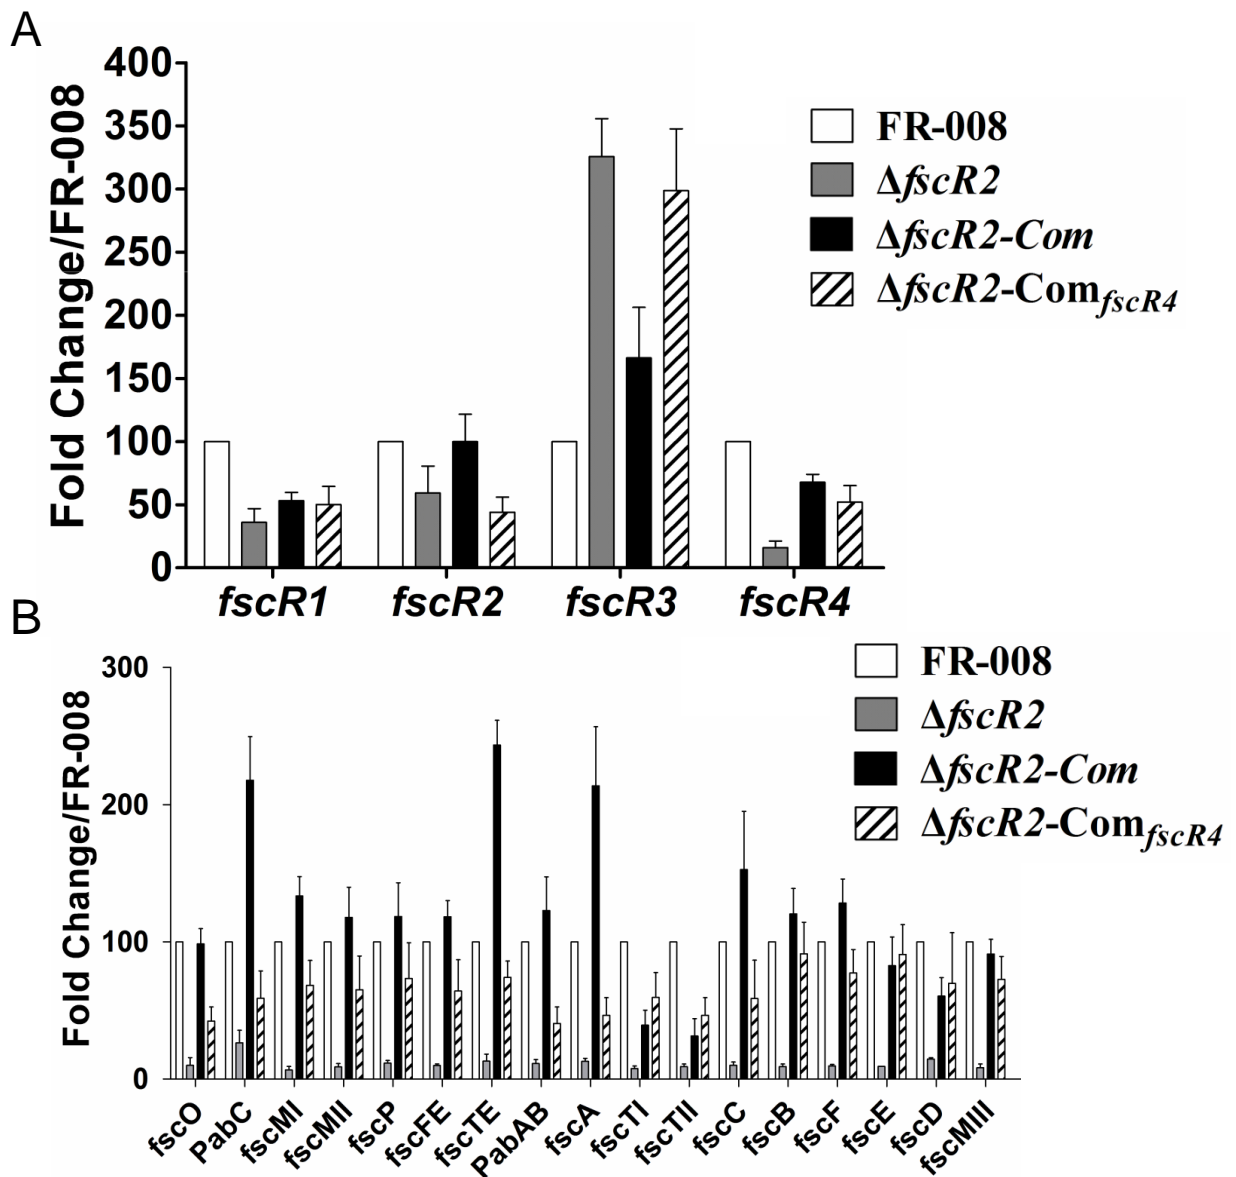

Figure S20. Transcription of FR-008 pathway genes in  $\Delta fscR2-Com_{fscR4}$ . RNA samples were isolated from *Streptomyces* sp. FR-008 and its derivatives grown for three days in YEME liquid medium. (A) Regulatory genes. (B) Structural genes. Expression of *hrdB*, which encodes the major sigma factor, was used as an internal control. The expression level of each gene in the wild-type strain was arbitrarily set to 100. The y-axis shows the fold change in expression level relative to the control. Results are the mean ( $\pm$ SD) from six biological experiments. Primers for regulatory genes were designed to an undeleted portion of the coding sequence.

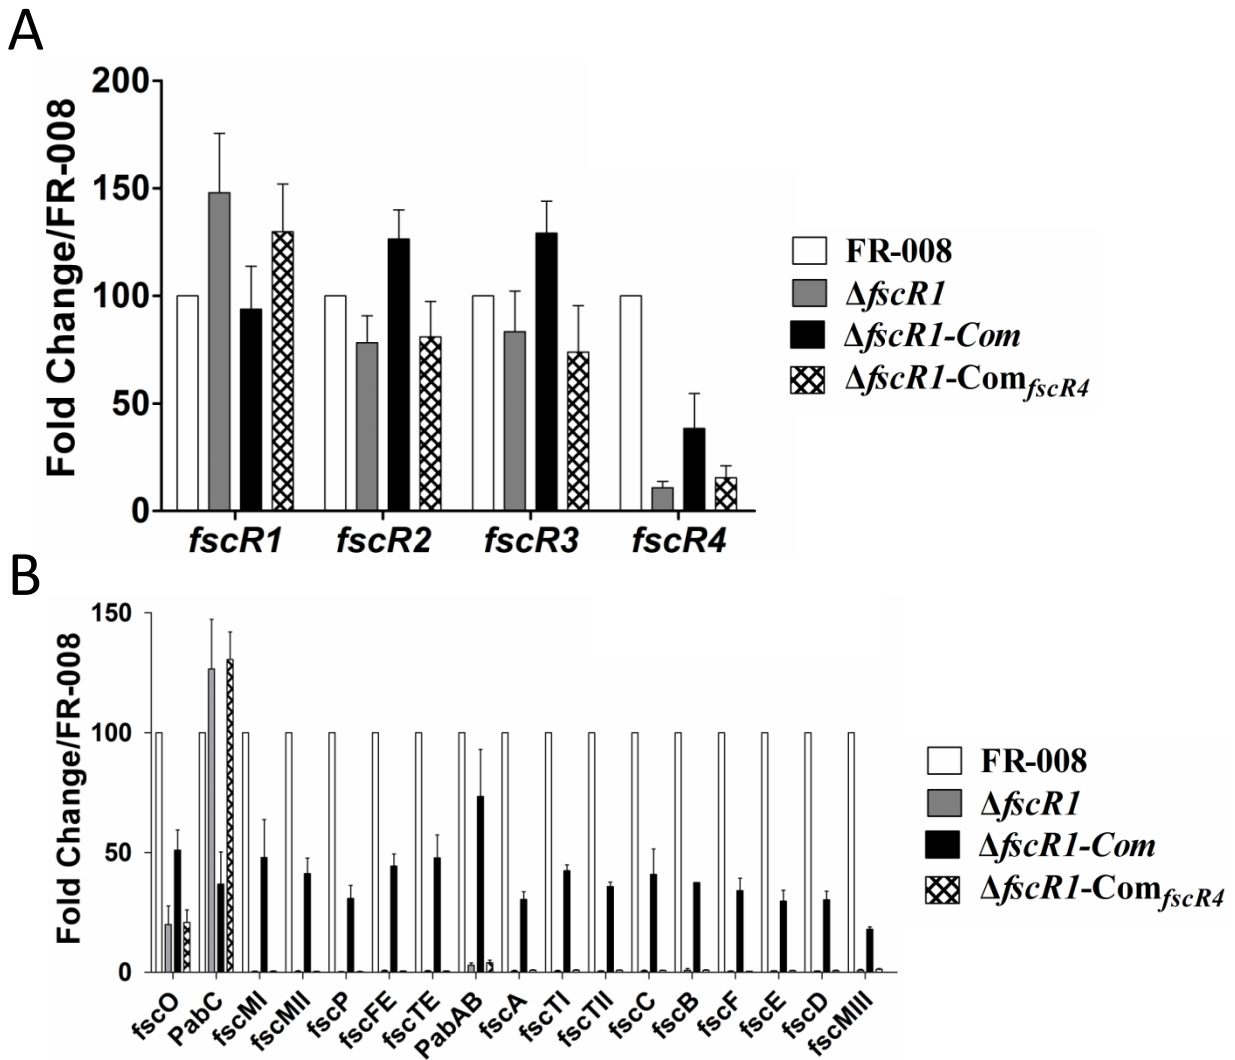

Figure S21. Transcription of FR-008 pathway genes in  $\Delta fscR1-Com_{fscR4}$ . RNA samples were isolated from *Streptomyces* sp. FR-008 and its derivatives grown for three days in YEME liquid medium. (A) Regulatory genes. (B) Structural genes. Expression of *hrdB*, which encodes the major sigma factor, was used as an internal control. The expression level of each gene in the wild-type strain was arbitrarily set to 100. The y-axis shows the fold change in expression level relative to the control. Results are the mean ( $\pm$ SD) from six biological experiments. Primers for regulatory genes were designed to an undeleted portion of the coding sequence.
